# Supplementary material
Source: Research Square preprint supplement (doi:10.21203/rs.3.rs-9013907/v1)
Supplement: Supplementary file 1 [file 02d888f58250182bc0af4b94.docx]

**Supplementary Figure Legends:**

**Fig. S1. Chromatin accessibility is established at genes that become nascently transcribed.**

**A.** Boxplot of nascent transcription levels (RPM) at all genes as grouped by quartiles of increasing chromatin accessibility (Q1–Q4). Pairwise Wilcoxon rank-sum tests were performed.

**B.** Genome-wide correlation between replicates of maternal-specific and paternal-specific chromatin accessibility across all 10-kb genomic bins (n = 168,917).
**C.** Parental-specific chromatin accessibility at all genes and randomized background control regions (RPKM).

**D.** Correlation between replicates of maternal-specific and paternal-specific chromatin accessibility at all repetitive elements, excluding simple repeats (n = 1,113).

**Fig. S2. Initially accessible repetitive elements are nascently transcribed prior to genic expression.**

**A.** Enrichment of repetitive elements (REs) within initially accessible regions assessed by Fisher’s exact test. Significantly enriched REs are shown in red and termed initially accessible REs; depleted or non-enriched REs are shown in blue. Gene promoters (TSS ±1 kb) with increasing accessibility are depleted and indicated by a blue triangle.

**B**. Enrichment of repetitive element classes within zygotically established accessible regions assessed by Fisher’s exact test. REs with log₂(odds ratio) > 1 and adjusted p-value *<* 0.05 are shown in red; depleted REs (log₂(odds ratio) < −1) are shown in blue. Gene promoters (TSS ±1 kb) are indicated by a red triangle.

**C.** Re-analysis of published click-iT nascent RNA-seq data (Chan *et al.*, 2019) comparing nascent transcription at initially accessible REs and gene promoters (TSS ±1 kb) in mid-MZT embryos (3 hpf) before genic transcriptional activation (p-value *=* 2.76 × 10⁻¹³, Wilcoxon rank-sum test).
**D.** Quantification of nascent transcript reads from Click-iT-Seq, assigned to either initially accessible regions, zygotically established accessible regions, or to gene promoters.

**E**. Pearson correlation between RE nascent transcription (RPM) in mid-MZT embryos vs RE chromatin accessibility (RPKM) in early MZT embryos and total RE transcript levels in eggs and 2-cell embryos. Initially accessible REs are shown in blue; all REs (excluding simple repeats) are shown in dark grey.

**F.** Re-analysis of published RNA-Seq data (Cabrera-Quio et al. 2021). Total transcript levels (RPM) of initially accessible REs in eggs, 2-cell, 64-cell (early MZT), and sphere (late MZT) embryos. Pairwise Wilcoxon rank-sum tests compare egg to subsequent embryonic stages (p-value *=* 0.3, 0.06, 0.03) and 2-cell to later stages (p-value *=* 0.06, 0.03).

**G.** Re-analysis of published small RNA-seq data (Yao *et al.*, 2014). Small RNA levels (RPM) in 1-cell embryos compared with 16-cell, 512-cell (early MZT), and oblong (late MZT) embryos (p-value *=* 0.30, 0.24, and 0.083, respectively, pairwise Wilcoxon rank-sum test,).

**Fig. S3. Transcriptionally competent Pol II is reduced at initially accessible repetitive elements during MZT.**
**A, B.** Pearson correlation of Pol II occupancy at REs among biological replicates in early MZT (**A**) and late MZT embryos (**B**).
**C, D.** Pearson correlation of Pol II occupancy across all 10-kb genomic bins among replicates in early MZT (**C**) and late MZT embryos (**D**).

**E.** Early MZT chromatin accessibility of all REs and REs with high early MZT Pol II occupancy (defined as having -log10(Poisson p-value) > 1 for Pol II occupancy). Pairwise Wilcoxson rank-sum test was performed.
**F.** Proportion of RE classes comprising REs with high Pol II occupancy (-log10(Poisson p-value) > 1), displayed as a pie chart.

**G.** Heatmap of Pol II occupancy at a select group (based on rank order) of initially accessible REs during early and late MZT. IgG CUT&RUN background was used as a background baseline, and significance was calculated using a Poisson model.

**H.** Boxplots depictMillidiv scores of all REs vs REs with high Pol II occupancy during early MZT (-log10(Poisson p-value) > 1). Lower Millidiv scores correspond with evolutionarily younger REs. Pairwise Wilcoxson rank-sum test was performed.

**I.** HOMER *de novo* sequence motif discovery identifies nucleotide combinations present at Early and Late MZT Pol II binding sites. p-values are provided along with significantly matched TF-family binding motifs.

**Fig. S4. H3K9me2 at initially accessible repetitive elements is maintained during MZT and correlates with H3K9me3 deposition after MZT.**

**A.** Scatterplot and Pearson correlation of H3K9me2 levels at all REs between biological replicates in early and late MZT.
**B.** Scatterplot and Pearson correlation of H3K9me2 levels across all 10-kb genomic bins between biological replicates.

**C.** Average H3K9me2 levels (RPKM) at Gypsy and DIRS transposons are displayed as profile plots.

**D.** Re-analysis of published H3K9me3 CUT&RUN data during gastrulation (Akdogan-Ozdilek *et al.*, 2022). Scatterplots show correlation between H3K9me2 at REs during early or late MZT and H3K9me3 at these REs during gastrulation. All REs are in grey and initially accessible REs are highlighted in blue.

**Fig. S5. MdG9a embryos are not developmentally delayed during MZT.**

**A.** Representative images showing that WT and MdG9a embryos reach the sphere stage at 4 hpf (late MZT).
**B.** Quantification of developmental stages at 2 hpf and 4 hpf in WT and MdG9a embryos (N = 3 independent experiments).
**C.** Scatterplot and Pearson correlation of Pol II occupancy at all REs between MdG9a late MZT replicates.
**D.** Scatterplot and Pearson correlation of Pol II occupancy across all 10-kb genomic bins between MdG9a late MZT replicates.

**E.** Pol II occupancy (–log₁₀(Poisson p-value)) at a select group (based on rank order) of initially accessible REs in WT early and late MZT embryos and MdG9a late MZT embryos.

**F.** Genomic annotation of regions with significantly increased or decreased Pol II occupancy, displayed as piecharts.

**G.** HOMER *de novo* sequence motif discovery identifies nucleotide combinations present at Late MZT Pol II binding sites of MdG9a embryos.

**Fig. S6. High reproducibility of RNA-seq datasets in WT and G9a mutant embryos.**

**A.** Scatterplot and Pearson correlation of RNA-seq signal across all 10-kb genomic bins between WT late MZT replicates.
**B.** Scatterplot and Pearson correlation among MdG9a late MZT RNA-seq replicates.
**C.** Scatterplot and Pearson correlation among MZG9a late MZT RNA-seq replicates.
