# Supplementary material
Source: Research Square preprint supplement (doi:10.21203/rs.3.rs-9013907/v1)
Supplement: Supplementary file 3 [file e58a2ddd1b40a9f257d7a290.docx]

**Supplementary Information**

**Materials and Resource Availability**

Requests for reagents and resources should be directed to and will be fulfilled by the Lead Contact, Patrick J. Murphy ([pjm249@cornell.edu](mailto:pjm249@cornell.edu)). Fish lines generated in this study, *G9a* deficient fish created using CRISPR, were made by the Tropepe laboratory (v.tropepe@utoronto.ca).

**Data and Code Availability**

Sequencing data generated in this study have been deposited in the NCBI Gene Expression Omnibus (GEO) under accession numbers GSE315075, GSE315157, GSE315067, and GSE314827. Additional information required to reanalyze the data generated in this study is available upon reasonable request.

**Acknowledgements**

We thank Dr. Paula Vertino, Dr. Cedric Feschotte, Dr. Kristin Murphy, and members of the Murphy lab for helpful discussions, including Dr. Brandon Park, Dr. Shan Hua, and Ms. Karli Casler. This work was supported by R35GM137833 (P.J.M.), R01HD105489 (P.J.M. and M.A.W.), F30HD117533 (D.K.N.), and T32GM007356 (University of Rochester Medical Scientists Training Program).

**Author Contributions**

P.J.M. and D.K.N. designed the study. D.K.N., P.P., T.E.M., and K.B. performed all experiments. T.E.M generated mutant zebrafish, and K.R.G generated zebrafish medaka hybrid embryos. D.K.N. analyzed data and created figures. D.K.N. and P.J.M. wrote the manuscript with input from all authors.

**Competing Interests**

The authors declare no competing or financial interests.

**Supplementary Methods**

**Experimental Model and Animal Procedures**

Adult wild-type AB and G9a zebrafish (*Danio rerio*) and wild-type medaka (*Oryzias latipes*) were maintained on a 14 h light:10 h dark cycle. Zebrafish care and maintenance were performed in accordance with animal care and use guidelines with ethical approval by the University Committee on Animal Resources at the University of Rochester Medical Center. The medaka (*O. latipes*) iCab wild-type strain and hybrid embryos were generated/maintained according to prior studies (Gert et al., 2023). Hybrid generation procedures were performed as previously described (Herberg et al., 2018). In vitro fertilization experiments were performed to generate hybrids in accordance with Austrian and European guidelines for animal research and were approved by the Amt der Wiener Landesregierung, Magistratsabteilung 58–Wasserrecht. Zebrafish experimental samples were early embryos ranging from 0 hours post-fertilization (hpf) to 4 hpf, during the embryonic period when sex determination has not yet occurred. Images of wild-type and G9a mutant zebrafish embryos were taken at 2 hpf, 4 hpf, or 24 hpf. Developmental stages were characterized by morphology.

**Embryo Immunofluorescence Imaging**

Embryos were collected at 2 hpf and 4 hpf and fixed overnight in 4% paraformaldehyde in 1× PBS. All subsequent steps were performed on a rocking platform. Embryos were washed several times in PBX (1× PBS, 0.1% Triton X-100) and blocked overnight in blocking buffer (1× PBS, 10% BSA, 0.5% Triton X-100). Embryos were incubated overnight with primary antibodies against H3K9me2 (Active Motif, 39041) and Pol II (Cell Signaling, 14958T) at a dilution of 1:250 in blocking buffer. After washing, embryos were incubated with Alexa Fluor 488–conjugated anti-rabbit IgG (Thermo Fisher, A-11008) and Alexa Fluor 633–conjugated anti-mouse IgG (Thermo Fisher, A-21052) secondary antibodies at 1:500 dilution. Confocal images were acquired and processed using Fiji. H3K9me2 intensity was quantified by measuring total nuclear signal using consistent intensity thresholds across all wild-type and maternal-null G9a (MnG9a) embryos. Pol II foci per nucleus were quantified using the Fiji plug-in ComDet (Katrukha, 2020) and quantified as described in previous studies of zebrafish (Ugolini et al., 2024).

**ATAC-seq**

Medaka–zebrafish hybrid embryos derived from zebrafish females were collected at 3 hpf (prior to ZGA in zebrafish), and hybrids derived from medaka females were collected at 5 hpf (prior to ZGA in medaka). Embryos were manually dechorionated, dissociated by pipetting, and nuclei were isolated by centrifugation at 600 g for 3 min followed by incubation in nuclear extraction buffer on ice for 10 min. Approximately 100,000 nuclei per replicate were used for library preparation following published ATAC-seq protocols (Buenrostro et al., 2015). Tagmentation was performed at 37 °C using Tn5 transposase (1:50 ratio). Reactions were stopped with SDS, DNA was then purified using a Zymo DNA extraction kit (D4013), and libraries were stored at −20 °C until amplification and Illumina sequencing.

**CUT&Tag and CUT&RUN**

CUT&Tag and CUT&RUN experiments were performed as previously described (Akdogan-Ozdilek et al., 2022). Embryos were collected at 2 hpf and 4 hpf, dechorionated, dissociated, and nuclei were isolated as described above. Nuclei were frozen at −80 °C until use. Approximately 100,000 nuclei per replicate were used. CUT&Tag libraries were generated using an anti-H3K9me2 antibody (Active Motif, 39041, 1:50), and CUT&RUN libraries were generated using an anti-Pol II CTD Ser5-P antibody (abcam, ab5408, 1:50), following established protocols (Janssens and Henikoff, 2019; Kaya-Okur et al., 2019). Libraries were sequenced with paired-end 150 bp reads on an Illumina NovaSeq X platform at the UR Genomics Research Center.

**RNA-seq**

Wild-type, maternal-null G9a, and maternal-zygotic-null G9a embryos were collected at 4 hpf, dechorionated, and homogenized in TRIzol. RNA was extracted using phenol–chloroform and purified using the Zymo Direct-zol RNA Miniprep kit. Libraries were prepared using the Illumina Stranded Total RNA Prep with Ribo-Zero and sequenced with paired-end 150 bp reads on a NovaSeq X platform.

**Sequencing Data Analysis**

ATAC-seq, CUT&Tag, CUT&RUN, and RNA-seq data were analyzed using standard pipelines as described in our prior studies (Akdogan-Ozdilek et al., 2022; Duong et al., 2024; Halblander et al., 2024; Meng et al., 2023; Murphy et al., 2020; Park et al., 2025) Analysis tools included FastQC, Cutadapt, Bowtie2, STAR, DiffBind, DESeq2, DeepTools, MACS2, HOMER, ChromHMM, and BEDTools. Additional details are provided below. Statistical significance was assessed using adjusted *P* values where applicable – to account for multiple testing.

For analysis of ATAC-Seq datasets: Raw sequencing reads were checked for quality using FastQC (version 0.11.9) (Andrews, 2010). Adapter sequences were removed using Cutadapt (version 2.7) (Martin, 2011). Sequencing reads were aligned to zebrafish genome assembly (GRCz11) using Bowtie2 (version 2.4.1) with default setting (Langmead and Salzberg, 2012). Picard SortSam was used to convert SAM files to SAM files. Sequence duplicates were removed using Picard MarkDuplicates (version 2.5.0), and genome browser bigwig files were generated using bamCoverage (version 3.5.1) with the options --normalizeUsing RPKM --binSize 10 --extendReads (Ramírez et al., 2016). Bigwigs were imported into the Integrative Genomics Viewer (version 2.8.13) (Robinson et al., 2011) for sequencing data visualization and generation of genome browser snapshots.

To identify differentially accessible regions throughout the genome between early and late MZT wild-type embryos, we first divide the entire genome into 10-kilobase (kb) genomic regions. These genomic regions and associated bam files for each replicate were used as input files for DiffBind (version 3.2.5) with default settings (Stark and Brown, 2011). Regions with significantly increased accessibility were defined as having an adjusted P < 0.05 and log2 fold change > 0.5, whereas regions with significantly decreased accessibility were defined as having an adjusted P < 0.05 and log2 fold change < -0.5.

For CUT&Tag and CUT&RUN studies: Raw sequencing reads were checked for quality using FastQC (version 0.11.9) (Andrews, 2010). Adapter sequences were removed using Cutadapt (version 2.7) (Martin, 2011). Sequencing reads were aligned to zebrafish genome assembly (GRCz11) using Bowtie2 (version 2.4.1) with default setting (Langmead and Salzberg, 2012). Picard SortSam was used to convert .sam files to .bam files and sort the resulting .bam files (“Picard Tools - By Broad Institute,” n.d.). Sequence duplicates were removed using Picard MarkDuplicates (version 2.5.0), and genome browser bigwig files were generated using bamCoverage (version 3.5.1, -normalizeUsing RPKM -binSize 10 -extendReads) (Ramírez et al., 2016). Bigwigs were imported into the Integrative Genomics Viewer (version 2.8.13) (Robinson et al., 2011) for sequencing data visualization and generation of genome browser snapshots.

To plot H3K9me2 and Pol II levels at REs, genes and background control, reads per kilobase per million mapped reads (RPKM)-normalized H3K9me2 and Pol II bigwig files of early MZT (2hpf) and late MZT(4hpf) wild-type and maternal-null G9a embryos were input into Deeptools multiBigWigSummary with parameters BED-file and –outRawCounts to calculate coverage scores at each genomic copy of each uniquely mapped repeats (simple repeats were excluded from the analysis), gene, or randomized background control (Ramírez et al., 2016). For RE, the H3K9me2 and Pol II coverage scores from different genomic copies were averaged for each repeat subclass using dplyr and the averaged scores were imported into R to generate boxplots and heatmaps using pheatmap.

To identify differential Pol II occupancy throughout the genome between wild-type and maternal-null G9a embryos, we first divided the entire genome into 10-kilobase (kb) genomic regions. These genomic regions and associated bam files for each replicate were used as input files for DiffBind (version 3.2.5) with default settings (Stark and Brown, 2011). Regions with significantly increased Pol II bindings were defined as having an adjusted P < 0.05 and log2 fold change > 1, whereas regions with significantly decreased Pol II bindings were defined as having an adjusted P < 0.05 and log2 fold change < -1.

To determine Pol II occupancy at specific RE, MACS2 bdg compare was used to subtract background noise measured in stage-matched CUT&RUN experiment of IgG control from signals measured in Pol II CUT&RUN (Zhang et al., 2008). Pol II occupancy is measured by p-value which is calculated using a Poisson model at each base pair in common between Pol II CUT&RUN (treatment) and IgG CUT&RUN (control). Pol II occupancy at initially accessible RE in wild-type and maternal-null G9a is plotted on heatmap to determine any misregulation of Pol II localization at RE upon G9a loss.

MACS2 bdg peakcall was used to determine Pol II peaks using output from MACS2 bdg compare. Using HOMER findMotifsGenome.pl (Heinz et al., 2010), we determined which TF motifs are enriched at Pol II peaks during early and late MZT in wild-type embryos and during late MZT in MnG9a embryos.

For RNA-Seq: Raw data were checked for quality using FastQC (version 0.11.9) (Andrews, 2010) and adapters were removed with Cutadapt (version 2.7) (Martin, 2011). Sequencing reads were mapped with STAR using the default settings (v.2.7.2a) and the option SortedByCoordinate to output sorted .bam files (Dobin et al., 2013). Mapped reads were calculated with featureCounts (v2.0.3 in subread) (Liao et al., 2014) using GRCz11.102.NCBI.RefSeq.gtf.

We re-analyzed previously published click-it nascent RNA-Seq dataset of early and mid MZT embryos (3hpf and 4hpf, respectively) (Chan et al., 2019). These data were used to assess nascent transcript abundance over repetitive regions and genes in early embryos. To compare stages, we sub-sampled BAM files to an equal number of total mapped reads (16.1M) and then used BamCoverage (without normalization) combined with multiBigWigSummary to calculate the total mapped reads at either initially accessible repeat-rich regions, zygotically established regions, or genic loci. In parallel, we performed read count normalization using BamCoverage and collected normalized read counts (RPM) over individual loci, classified as either initially accessible or TSS using multiBigWigSummary. To establish a comprehensive list of genes that are zygotically expressed, we used featureCounts to determine the number of click-it nascent RNA-Seq reads at each gene. Read counts were normalized to the sum of mapped read counts of each sample and reported as reads-per-million mapped reads (RPM). We made a list of zygotically transcribed genes which were defined as having more than 2 RPM click-it nascent RNA-Seq. Next, we used our own RiboMinus RNA-Seq data of wild-type, Maternal-null G9a and Maternal-zygotic-null G9a late MZT (4 hpf) embryos and quantify read counts at genes. Read counts from featureCounts is input into DESeq2 (Love et al., 2014) to determine differential expression of zygotic genes between wild-type and maternal-null G9a and between wild-type and maternal-zygotic-null G9a late MZT (4 hpf) embryos (adjusted P < 0.05). Differentially upregulated genes were defined as having log2 fold change greater than 1. Differentially downregulated genes were defined as having log2 fold change less than -1. The differential data were imported into R to plot transcription changes in log2 fold change (maternal-null or maternal-zygotic G9a/wild-type late MZT embryos) of zygotic genes from the pre-determined zygotic gene list.

Proportions of RE classes, genes, and intergenic regions within genomic regions found to have differential accessibility and Pol II occupancy change in late MZT/early MZT embryos and maternal-null G9a/wild-type late MZT embryos were determined using ChromHMM (version 1.25) (Ernst and Kellis, 2017). Proportions of each elements, genes and intergenic regions were generated and input into R (version 4.0.3) to make pie charts. To determine enrichment of specific RE in genomic regions with significantly decreased and increased accessibility during MZT, BEDTools fisher was used to calculate significantly enriched RE defined as adjusted P < 0.05 and log2 (odd ratio) > 1 (Quinlan and Hall, 2010).

plotHeatmap and plotProfile from deepTools (version 3.5.4) (Ramírez et al., 2016) or pheatmap package in R were used to make create heatmaps and profile plots. Affinity Designer (version 1.9.1) was used to adjust fonts and labels. Boxplots and scatterplots were generated on R and fonts and labels were adjusted on Affinity Designer. In boxplots, the horizontal line represents the median, and the box represents the interquartile range. The whiskers are the 75th percentile plus 1.5x the interquartile range (upper whisker) and the 25th percentile minus the 1.5x the interquartile range (lower whisker). Pair-wise Wilcoxson rank sum test and Student t-test were used to determine statistical significance and defined as p-value < 0.05. For differential tests (DiffBind and DESeq2) adjusted p-values which correct for multiple comparisons were reported. Pearson correlation test was used to examine correlation between data.

**Data Visualization and Statistics**

Heatmaps and profile plots were generated using deepTools and R. Figures were prepared using Affinity Designer. Statistical analyses included Wilcoxon rank-sum tests, Student’s *t*-tests, Pearson correlation tests, and multiple-testing–corrected differential analyses. A *P* value < 0.05 was considered statistically significant.
