# Supplementary material
Source: Research Square preprint supplement (doi:10.21203/rs.3.rs-9013907/v1)

**Fig. S1**

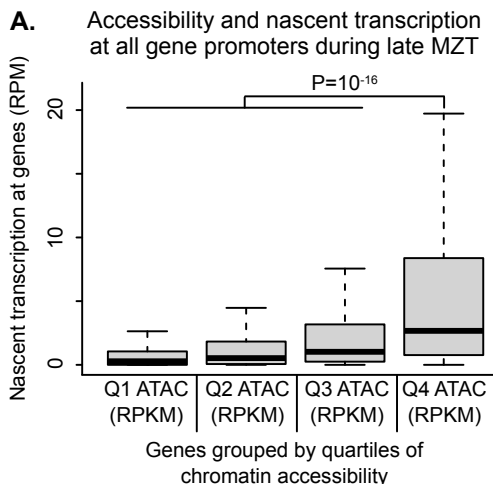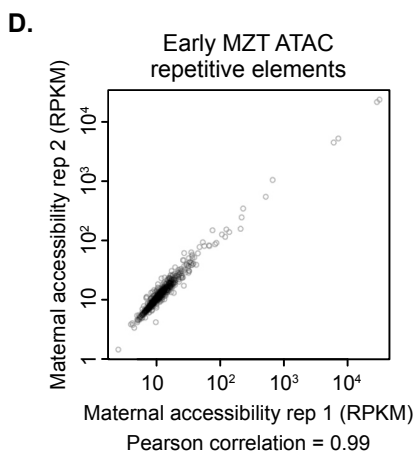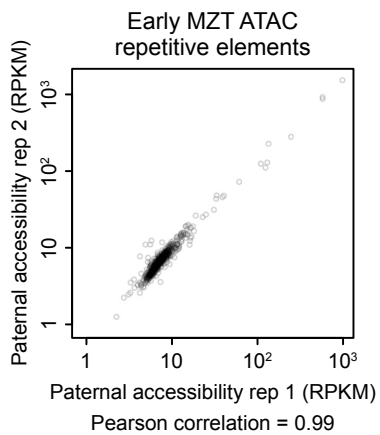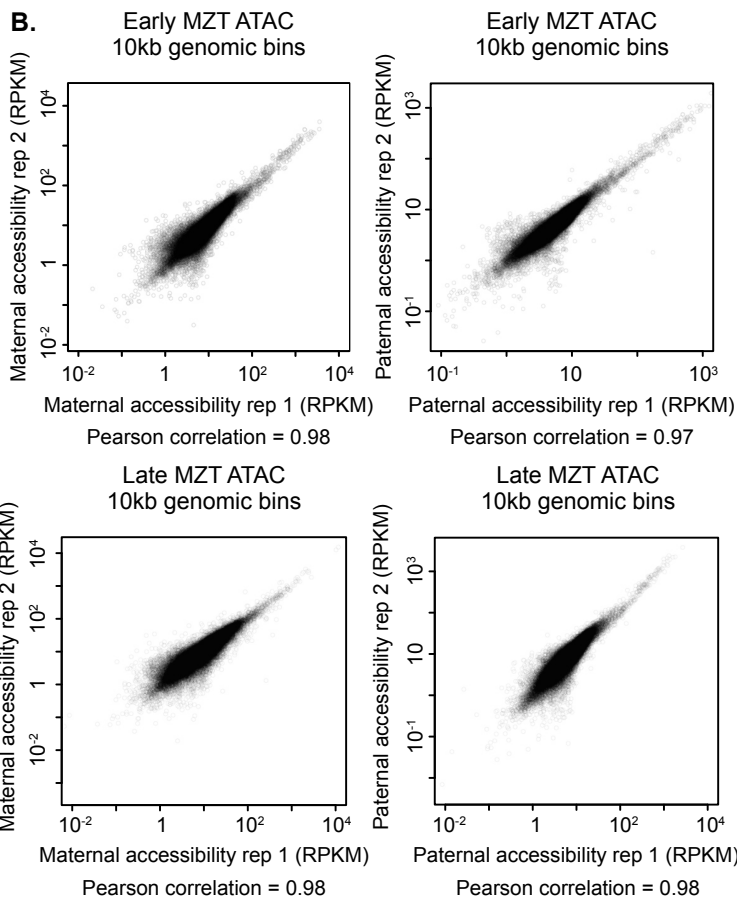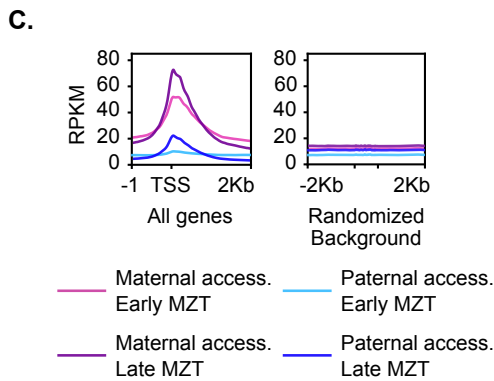

**Fig. S2.**

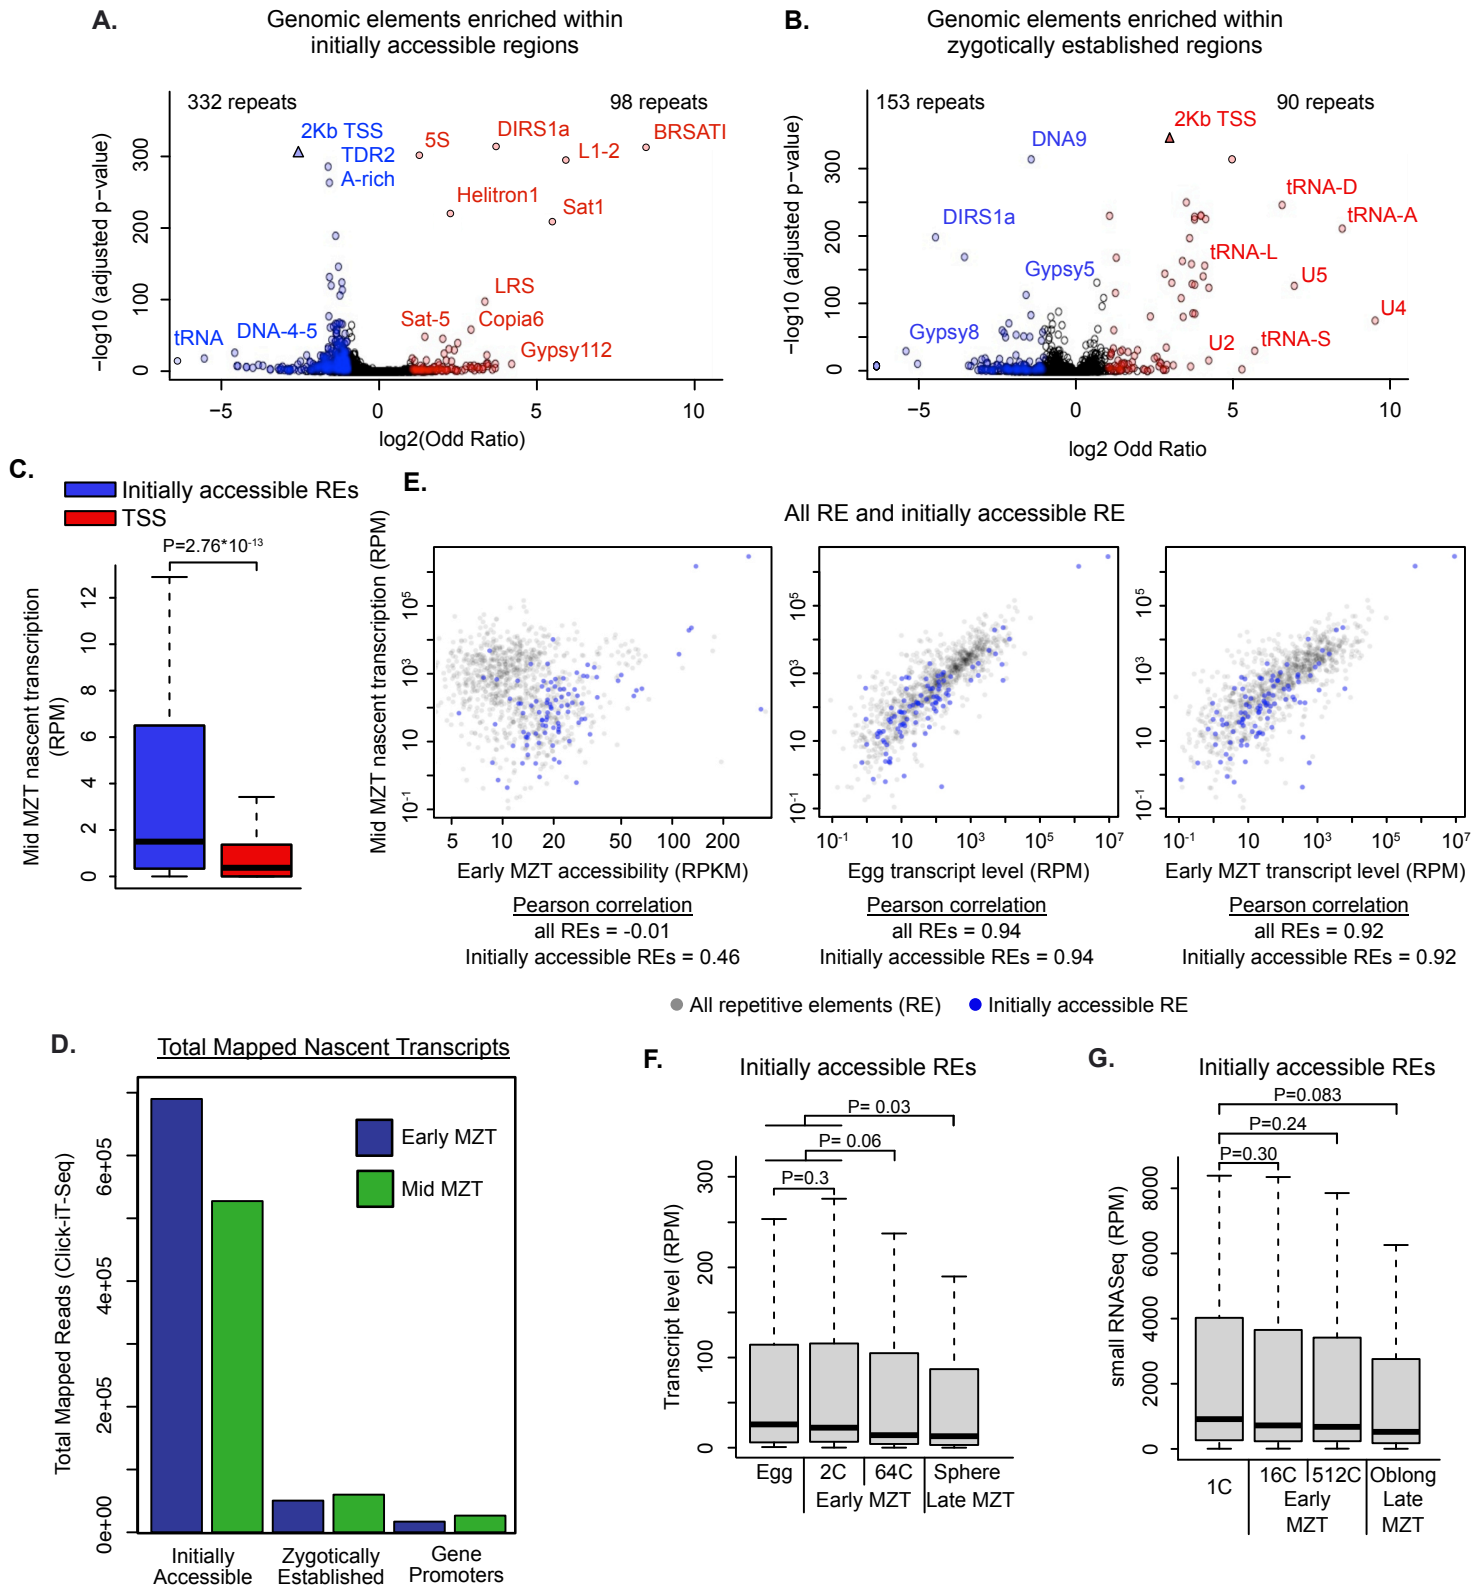

**Fig. S3**

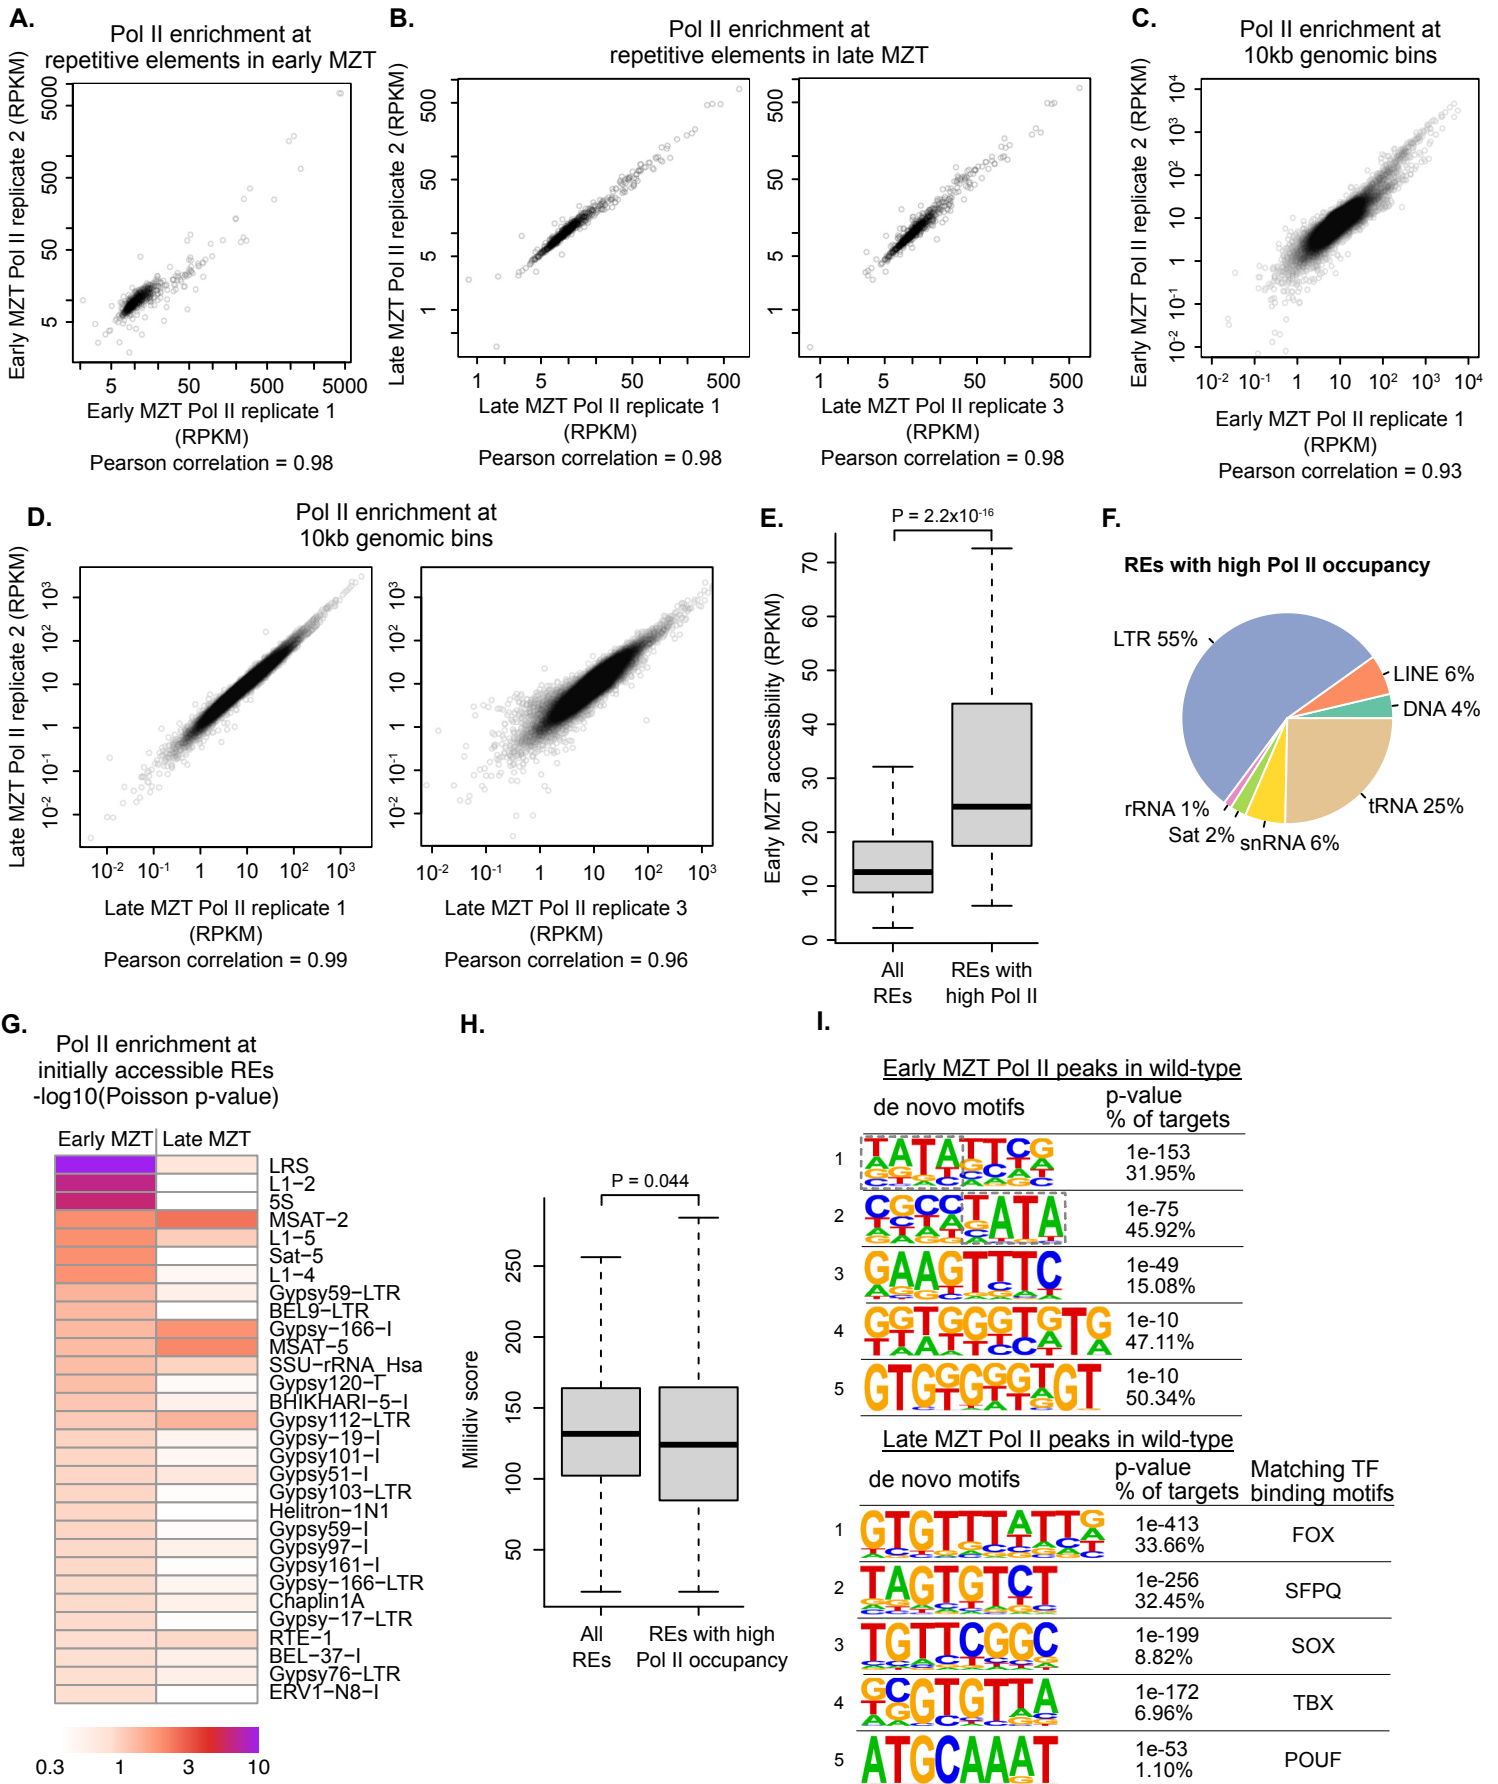

**Fig. S4**

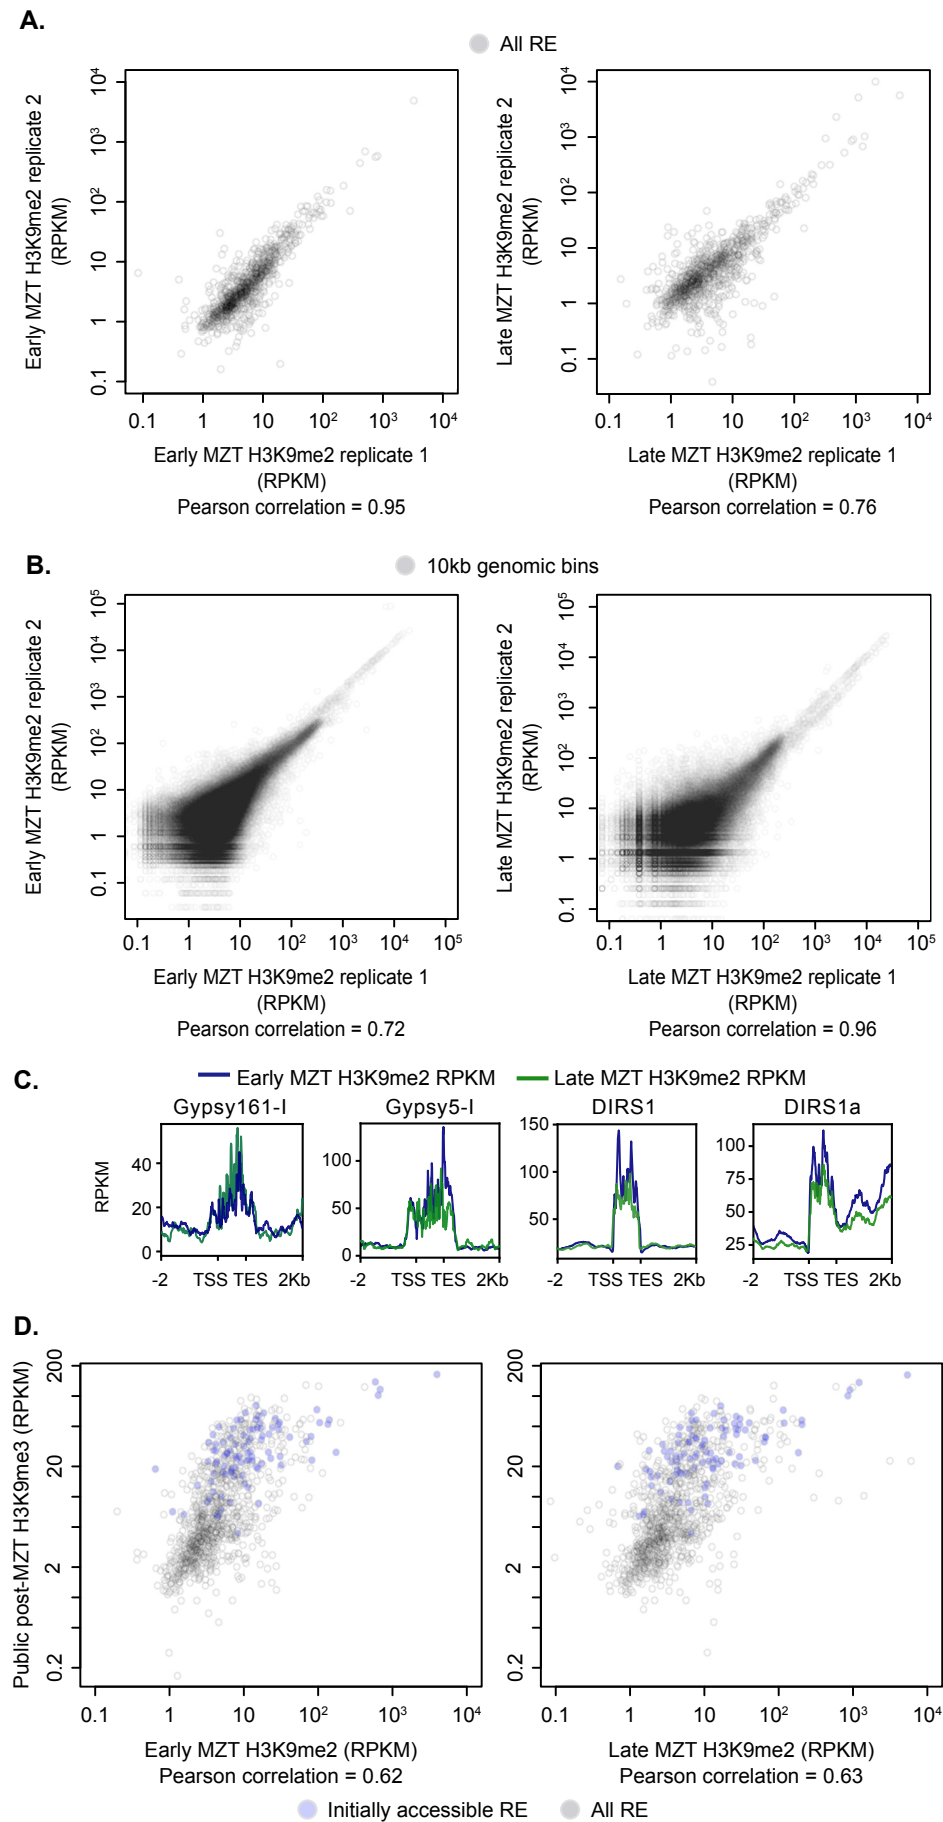

**Fig. S5**

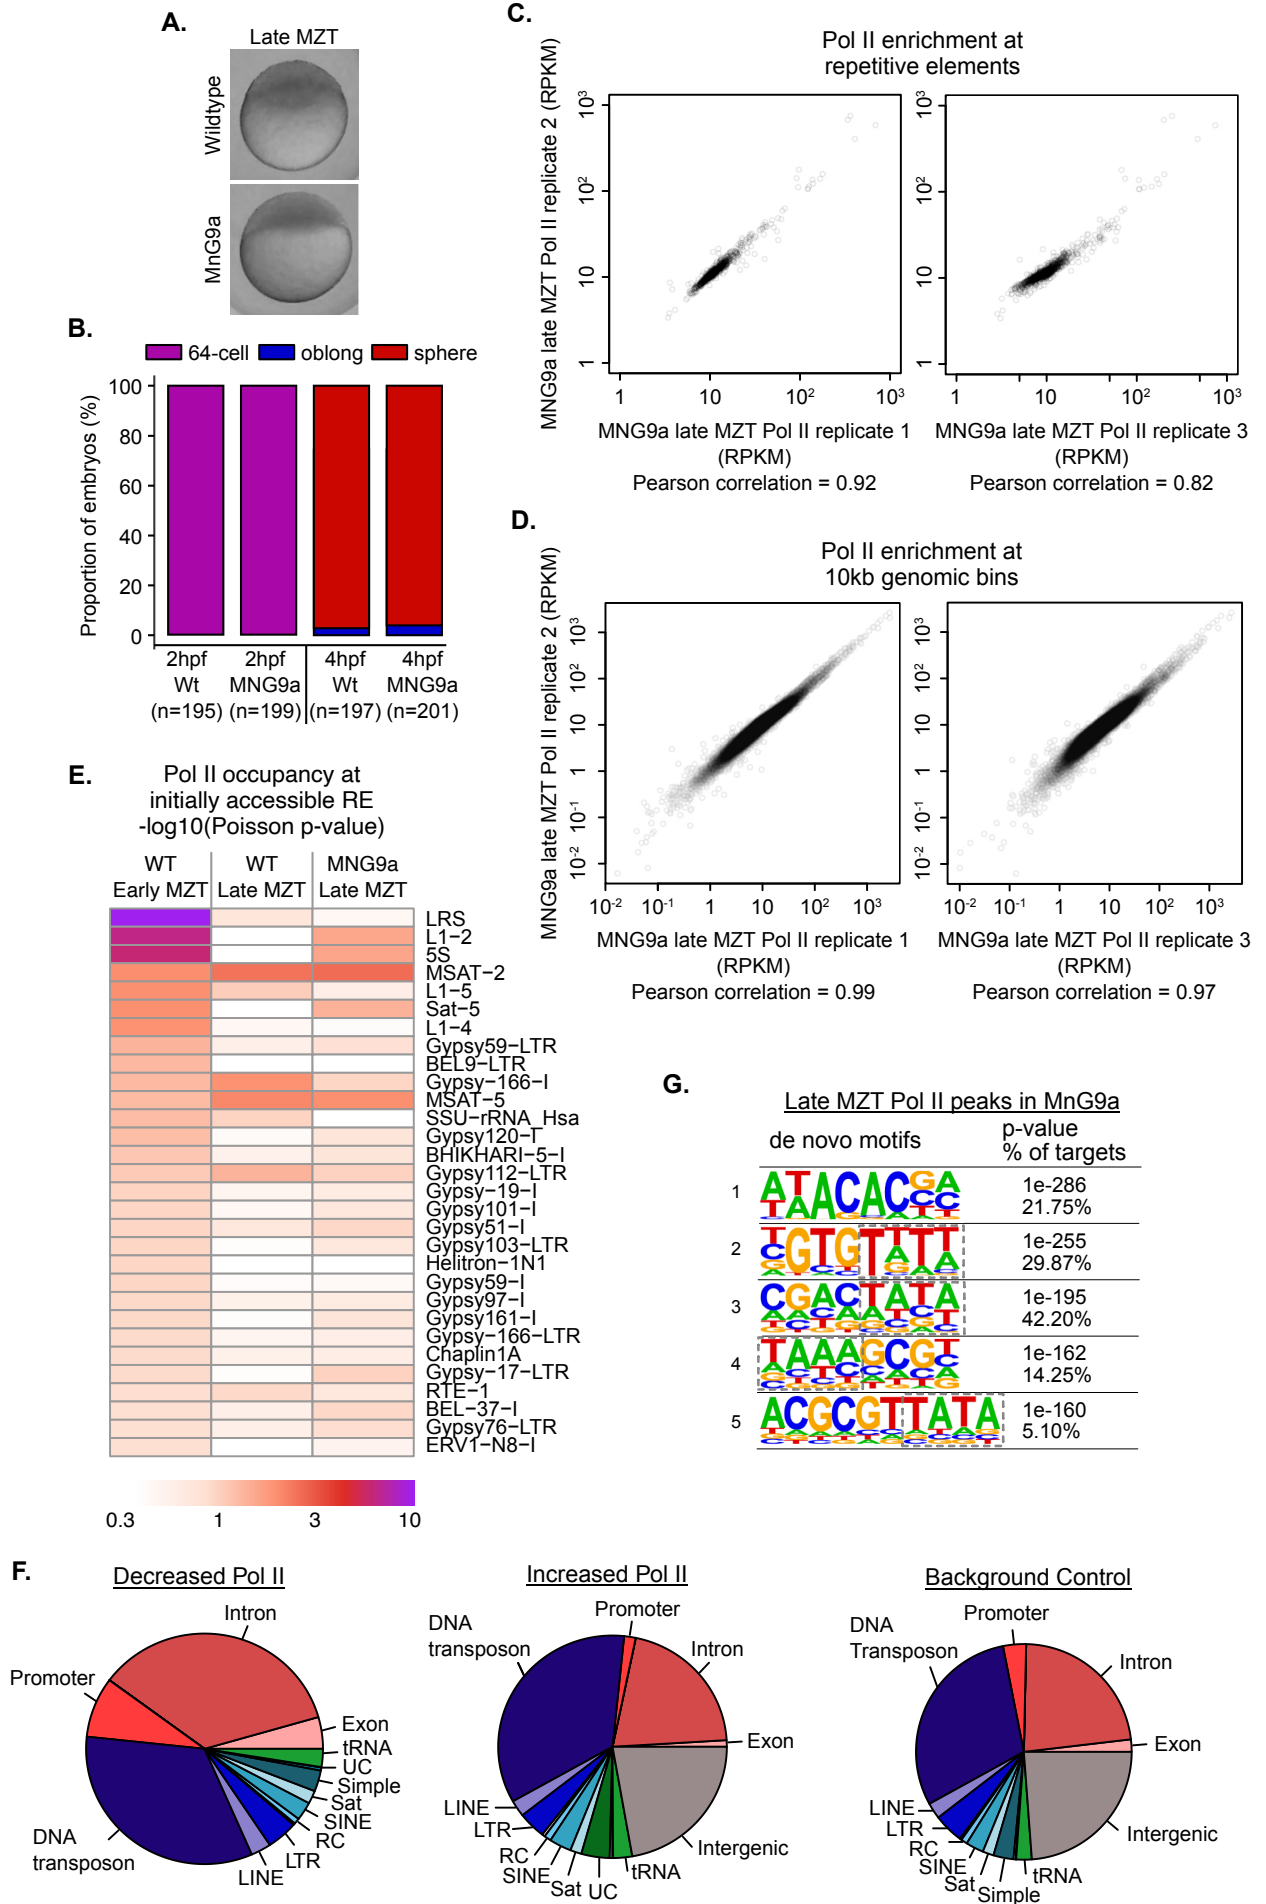

**Fig. S6**

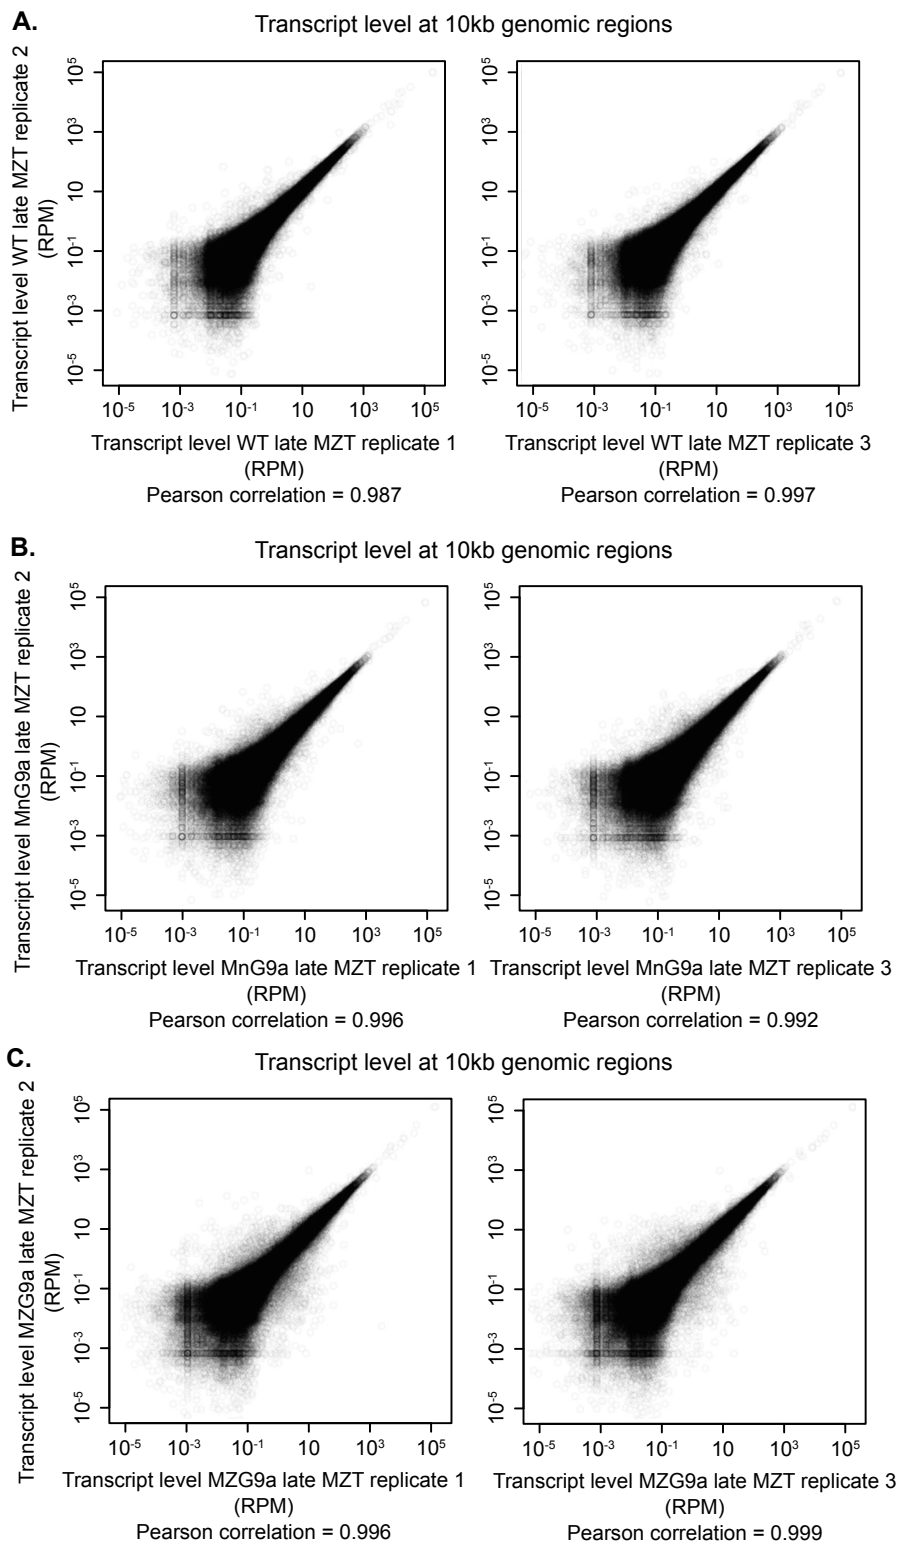

Supplement: Supplementary file 2 [file bd08e2d9e58b9dcfc84e6579.pdf]
